# Supplementary material for: Deletion of Cd151 reduces mammary tumorigenesis in the MMTV/PyMT mouse model
Source: PubMed Central journal article supplement (PMC4226978; doi:10.1186/1471-2407-14-509), 2014-07-11
Supplement: 1471-2407-14-509-S2.pdf [file 1471-2407-14-509-S2.pdf]

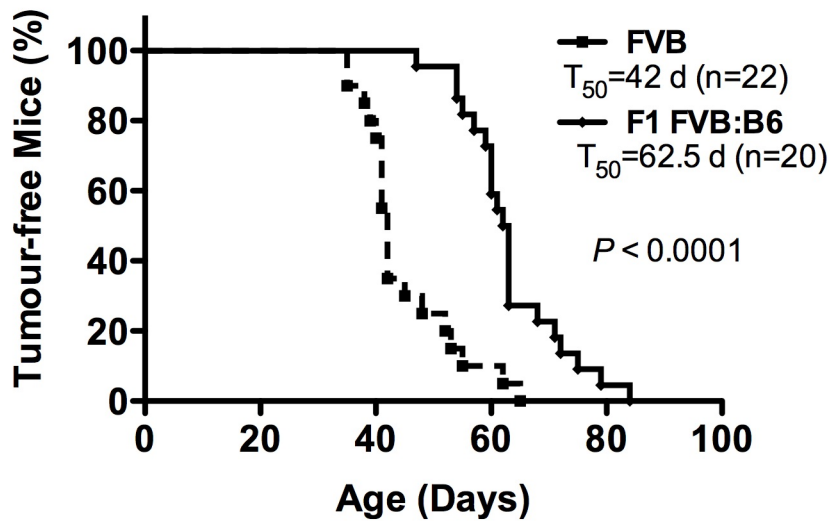

**Additional file 2: Supplementary Figure 2. Effect of the genetic background on MMTV/PyMT tumor onset.** The appearance of mammary tumors in wild-type pure FVB or F1 FVB:B6 mice was monitored by bi-weekly palpation and is represented on a Kaplan-Meier survival curve. T<sub>50</sub> indicates the median time to development of a palpable mammary tumor for each group of mice. The difference in T<sub>50</sub> between FVB (42 d) and F1 FVB:B6 (62.5 d) was statistically significant ( $P=0.0001$ ).
